# Supplementary material for: Inside the Mind of a Medicinal Chemist: The Role of Human Bias in Compound Prioritization during Drug Discovery
Source: PLoS One. 2012 Nov 21;7(11):e48476. doi: 10.1371/journal.pone.0048476 (PMC3504051; doi:10.1371/journal.pone.0048476)
Supplement: Table S7 — Descriptors identified as important by the SNB classifiers for selections made by the simulated classifiers. The best 1 parameter model is designated 1_paramater (this corresponds to the descriptor that underlies the primary parameter), and the final SNB model is designated N_parameters. (XLSX) [file pone.0048476.s019.xlsx]

## Sheet: 143_models_SNB_parameters
Simulated Classifier	Descriptors	SNB Classifier
Atoms	atoms_bin	N_parameters
Molecular_PolarSurfaceArea	Molecular_PolarSurfaceArea	N_parameters
atoms_MPSA	atoms_bin	N_parameters
atoms_MPSA	Molecular_PolarSurfaceArea	N_parameters
Substruct_Rings	RB_AB_RA_SA	N_parameters
Substruct_FG	smarts_fp	N_parameters
Substruct_Rings_FG	RB_AB_RA	N_parameters
Substruct_Rings_FG	smarts_fp	N_parameters
Atoms_MPSA_Substruct_Rings	Num_Atoms	N_parameters
Atoms_MPSA_Substruct_Rings	Molecular_PolarSurfaceArea	N_parameters
Atoms_MPSA_Substruct_Rings	RB_AB_RA	N_parameters
Atoms_MPSA_Substruct_Rings_FG	Num_Atoms	N_parameters
Atoms_MPSA_Substruct_Rings_FG	Molecular_PolarSurfaceArea	N_parameters
Atoms_MPSA_Substruct_Rings_FG	smarts_fp	N_parameters
Atoms_MPSA_Substruct_Rings_FG	RB_AB_RA	N_parameters
Atoms	atoms_bin	1_parameter
Molecular_PolarSurfaceArea	Molecular_PolarSurfaceArea	1_parameter
atoms_MPSA	Molecular_FractionalPolarSurfaceArea	1_parameter
Substruct_Rings	RB_AB_RA_SA	1_parameter
Substruct_FG	smarts_fp	1_parameter
Substruct_Rings_FG	smarts_fp	1_parameter
Atoms_MPSA_Substruct_Rings	RB_AB_RA_SA	1_parameter
Atoms_MPSA_Substruct_Rings_FG	smarts_fp	1_parameter
